# Supplementary material
Source: PubMed Central journal article supplement (PMC3504654)

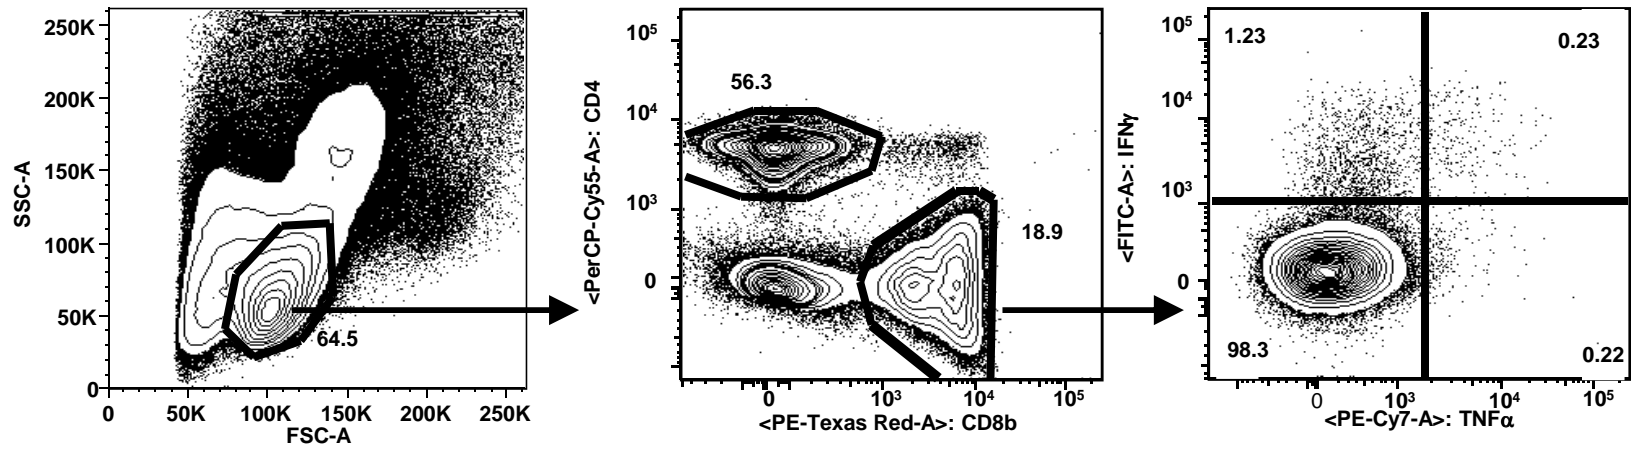

**SUP FIGURE 1**

CD8

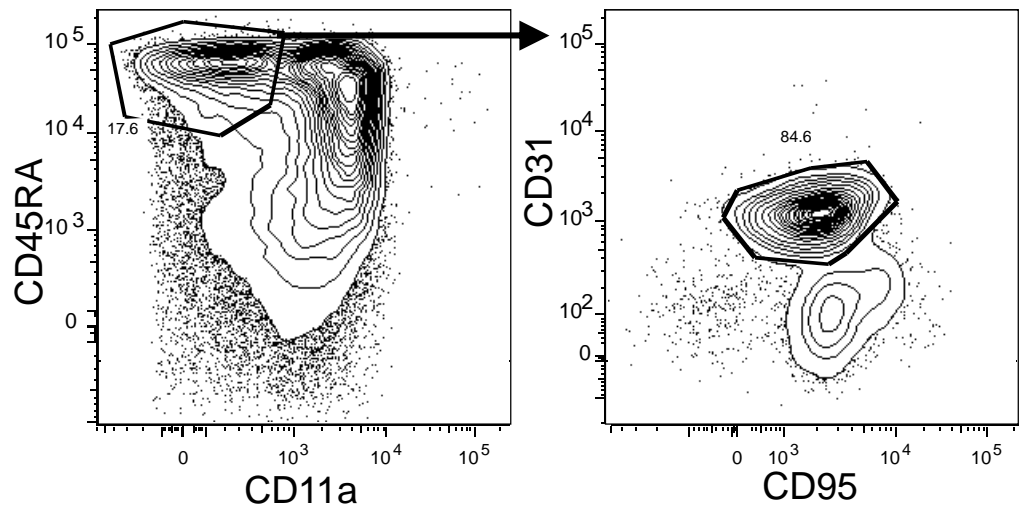

**SUP FIGURE 2**

CD4

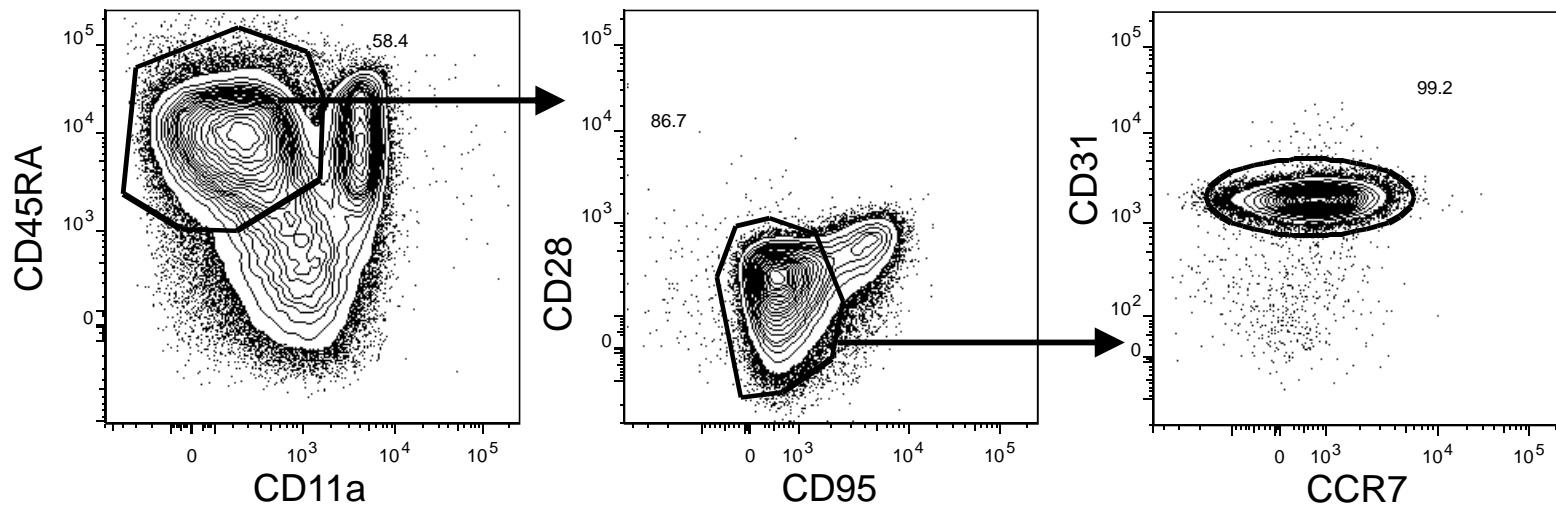

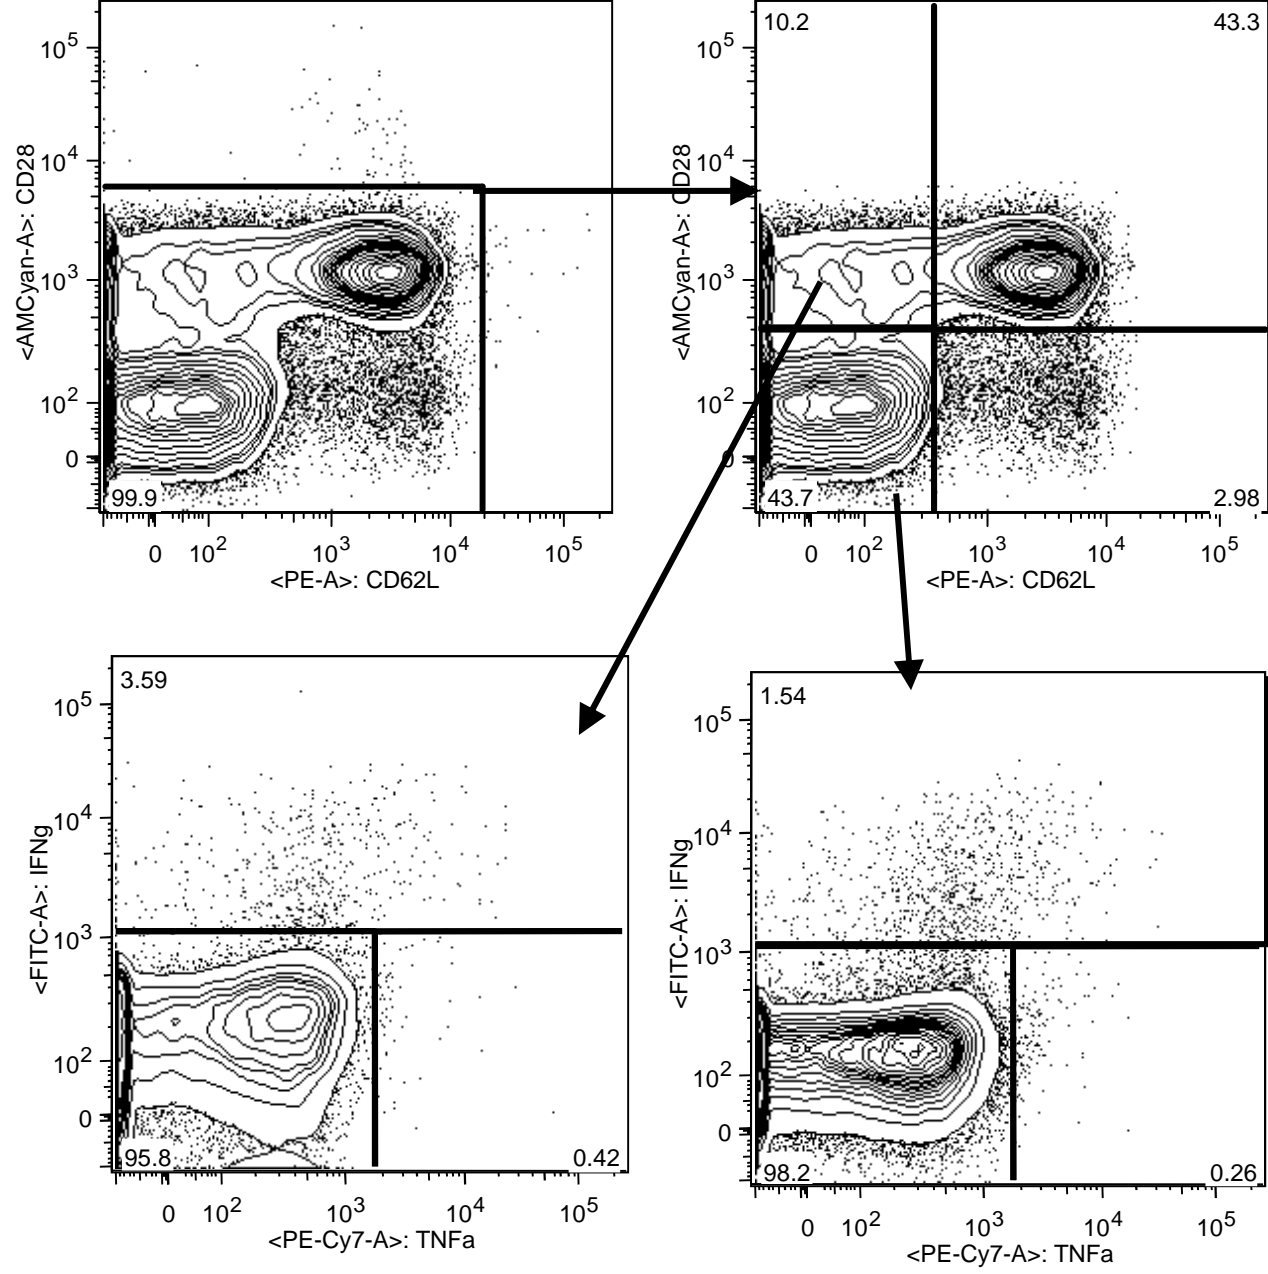

**SUP FIGURE 3**

Supplement: NIHMS419918-supplement-01.pdf [file NIHMS419918-supplement-01.pdf]
